# Supplementary material for: Development of a Vascularized Human Skin Equivalent with Hypodermis for Photoaging Studies
Source: MDPI journal article supplement (doi:10.3390/biom12121828), 2022-12-07
Supplement: s1 [file s1]

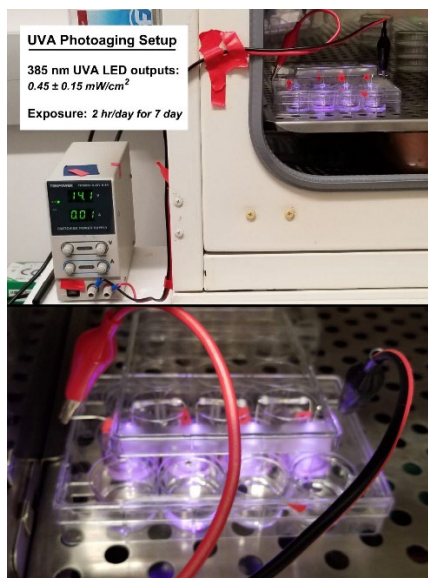

**Figure S1: UVA Photoaging Setup.** UVA exposure was completed by drilling out a well plate lid and inserting UVA LEDs. Each LED had an output of  $0.45 \pm 0.15 \text{ mW/cm}^2$ . AVHSEs were exposed daily for 2 hours, for 7 days.
